# Supplementary material for: Three-dimensional niche stiffness synergizes with Wnt7a to modulate the extent of satellite cell symmetric self-renewal divisions
Source: PubMed Central journal article supplement — Mol Biol Cell. 2020 Jul 21;31(16):1703–13. doi: 10.1091/mbc.E20-01-0078 (PMC7521850; doi:10.1091/mbc.e20-01-0078), 2020-07-21
Supplement: mbc-31-1703-s001.pdf [file mbc-31-1703-s001.pdf]

# Supplemental Materials

*Molecular Biology of the Cell*

Moyle et al.

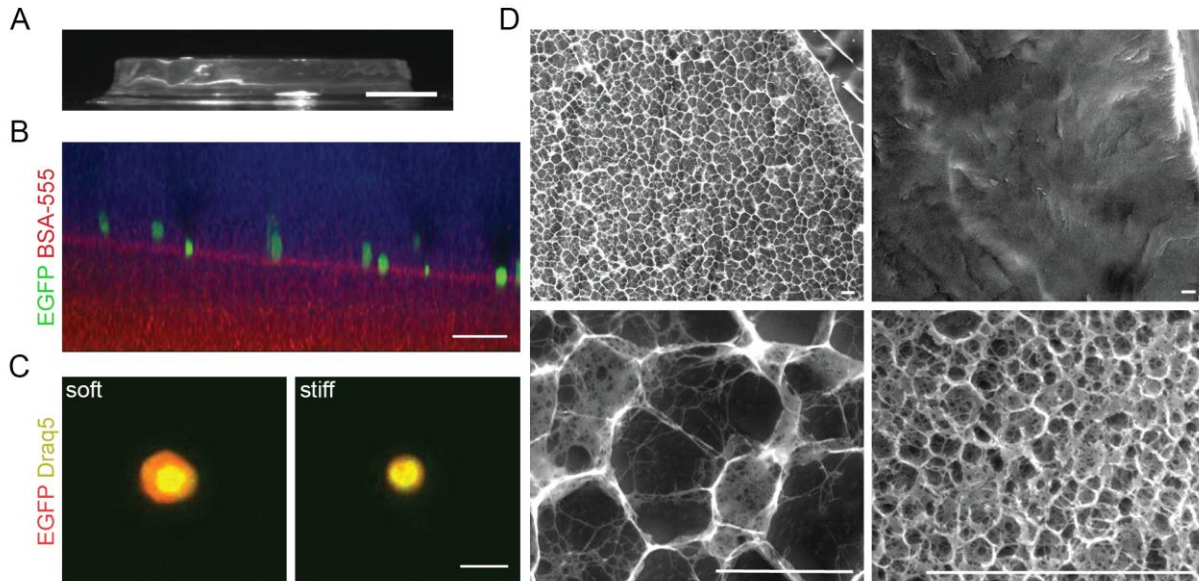

**Supplemental Figure S1. Characterization of the 3D artificial niche culture platform.** **(A)** Representative photograph showing side profile of an agarose gel. Scale bar, 2.5 mm. **(B)** Confocal image of green fluorescent protein (GFP)<sup>+</sup> myoblasts in 3D culture between the interface of two agarose gels pre-mixed with bovine serum albumin-conjugate with AlexaFluor 546 (bottom) and AlexaFluor 647 (top). Scale bar, 50  $\mu$ m. **(C)** Confocal images of EGFP<sup>+</sup> myoblasts (red) fixed and counterstained with the nuclear stain Draq5 (yellow) 24 hours post-embedding in soft (left panel) or stiff (right panel) agarose gels. Scale bar, 20  $\mu$ m. **(D)** Cryo-field emission scanning electron microscope images of 0.5% (left panels) compared to 3% weight per volume agarose hydrogel (right panels) at low (top) and high (bottom) magnifications. Scale bars, 5  $\mu$ m.

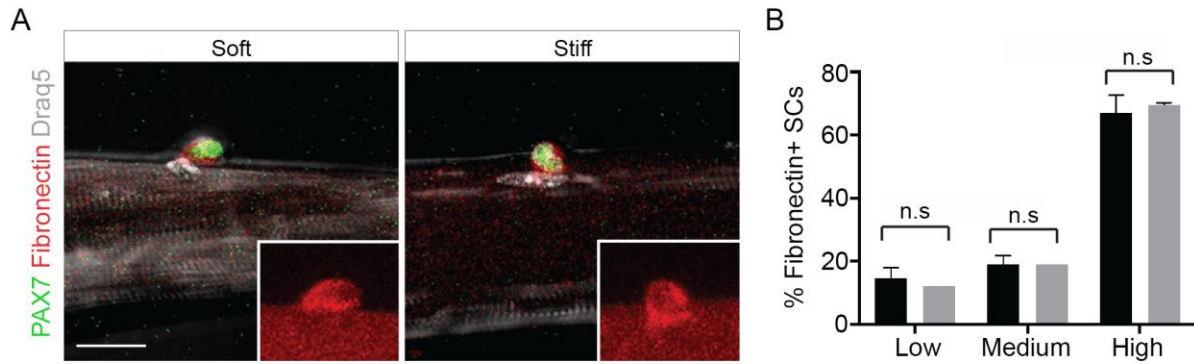

**Supplemental Figure S2. Three-dimensional niche stiffness does not alter satellite cell fibronectin production. (A, B)** Single fibers embedded within soft or stiff 3D agarose hydrogels for 24 hours and fixed 36 hours post-isolation. **(A)** Representative confocal images immunostained for Pax7 (green) and Fibronectin (red). Scale bar, 50  $\mu$ m. **(B)** Bar graph of the relative expression of fibronectin expressed by SCs embedded within soft (black) and stiff (grey) 3D niches. N = 2 animals/ condition, with at least 5 fibers analyzed per animal.
